# Supplementary material
Source: PubMed Central journal article supplement (PMC6969535)
Supplement: pnas.1911936117.sapp.pdf [file pnas.1911936117.sapp.pdf]

# PNAS

[www.pnas.org](http://www.pnas.org)

Supplementary Information for

**Multivalent interaction of ESCO2 with the replication machinery is required for sister chromatid cohesion**

Dawn Bender, Eulália Maria Lima Da Silva, Jingrong Chen, Annelise Poss, Lauren Gawey, Zane Rulon, and Susannah Rankin

Susannah Rankin

Email: [susannah-rankin@omrf.org](mailto:susannah-rankin@omrf.org)

**This PDF file includes:**

Tables S1 to S5

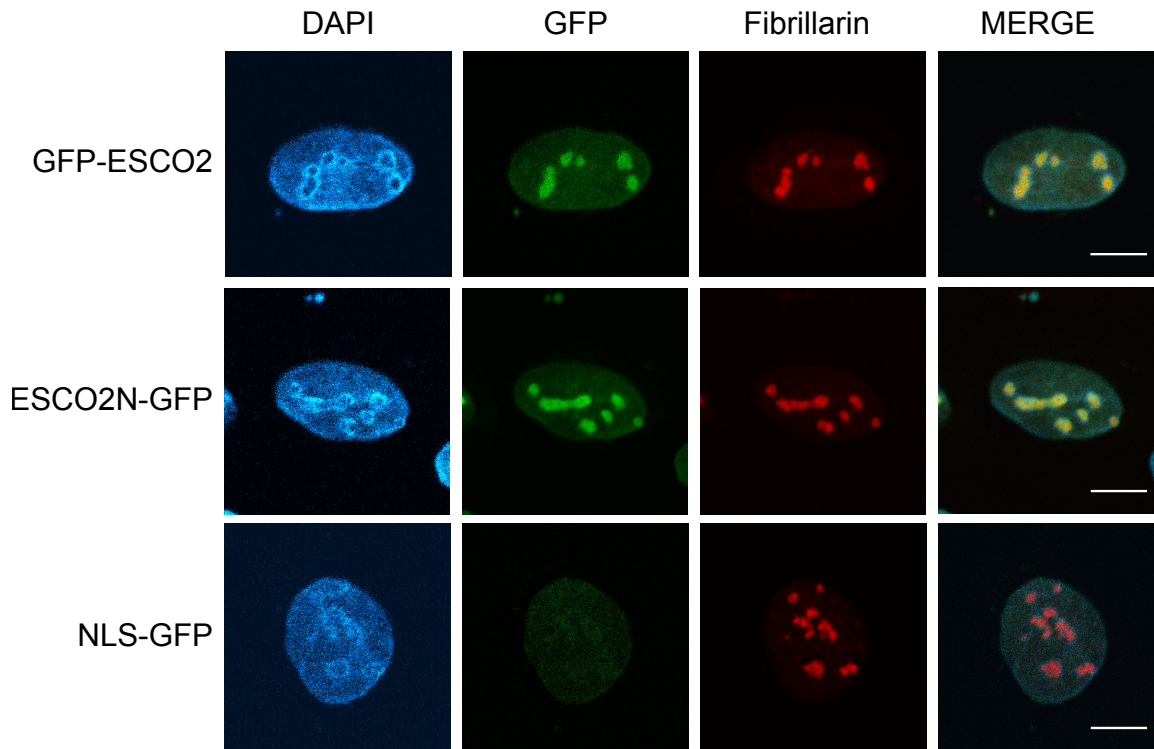

**Figure S1. Nucleolar localization of ESCO2**

Constructs encoding either full length GFP-ESCO2 (top), or the N terminus of ESCO2 fused to GFP (middle) or nuclear localized GFP (bottom) were cotransfected with a construct encoding mCherry tagged nucleolin and cells were imaged by confocal microscopy. The intensity of nucleolar staining varied depending on the experiment, but was evident for both full-length ESCO2 and ESCO2N.

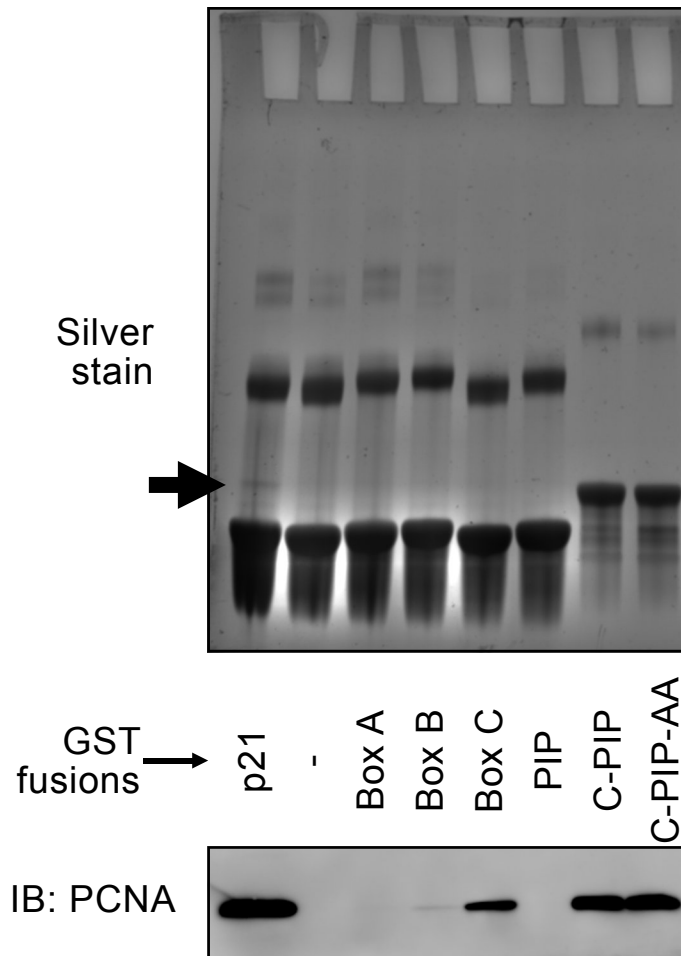

**Figure S2. Silver stained gel of GST-fusion protein pull-downs.**

GST fusions to the indicated peptides were incubated in *Xenopus* egg extract and retrieved using glutathione beads (as in Figures 4 and 5). The samples were eluted in sample buffer and run on two gels: one for silver stain (top) and the second for immunoblot analysis (at bottom). PCNA can be seen in the p21 lane (heavy black arrow). PCNA is not clearly detectable in the other lanes, where it is easily detected by immunoblot (box C). No additional bands are seen, although multimers of GST fusions are present. This experiment was repeated more than six times, with similar results.

Table S1.

**Accession numbers from alignment in Figure 3A.**

| <b>Accession</b> | <b>organism</b>                | <b>common name</b>   | <b>Length<br/>(a.a.)</b> |
|------------------|--------------------------------|----------------------|--------------------------|
| NP_001003872     | Danio rerio                    | zebrafish            | 609                      |
| NP_001133441     | Salmo salar                    | salmon               | 631                      |
| NP_001089603     | Xenopus laevis                 | African clawed frog  | 702                      |
| NP_001121462     | Xenopus tropicalis             | tropical clawed frog | 770                      |
| XP_014343155     | Latimeria chalumnae            | coelacanth           | 702                      |
| XP_006132649     | Pelodiscus sinensis            | turtle               | 685                      |
| XP_420012        | Gallus gallus                  | chicken              | 691                      |
| XP_026702143     | Athene cunicularia             | owl                  | 624                      |
| NP_082315        | Mus musculus                   | mouse                | 592                      |
| XP_006252234     | Rattus norvegicus              | rat                  | 595                      |
| XP_011542723     | Homo sapiens                   | man                  | 601                      |
| XP_004382239     | Trichechus manatus latirostris | manatee              | 614                      |
| XP_022265548     | Canis lupus familiaris         | dog                  | 598                      |
| NP_001094652     | Bos taurus                     | cattle               | 610                      |
| XP_014593313     | Equus caballus                 | horse                | 612                      |
| XP_007664914     | Ornithorhynchus anatinus       | platypus             | 639                      |
| XP_007475966     | Monodelphis domestica          | opossum              | 610                      |
| XP_020839651     | Phascolarctos cinereus         | koala                | 607                      |

**Table S2. Cohesion assay results for various mutant alleles of ESCO2. In support of Figure 3 D-E.**

| Exp. #       | WT   | BoxA | $p$    | Box B | $p$    | Box C | $p$    | PIP  | $p$    | Comments                        |
|--------------|------|------|--------|-------|--------|-------|--------|------|--------|---------------------------------|
| <b>E1181</b> | 17.9 | 59.8 | <.0004 | 56.1  | <.0004 | 33.0  | 0.0548 | -    |        |                                 |
| <b>E1182</b> | 8.7  | 56.6 | <.0004 | 36.8  | <.0004 | 47.0  | <.0004 | -    |        |                                 |
| <b>E1183</b> | 17.7 | 74.4 | <.0006 | 66.4  | <.0006 | 35.3  | 0.0168 | -    |        |                                 |
| <b>E1563</b> | 12.5 |      |        |       |        | 64.0  | 0.0384 | 91.0 | <.0006 | PIP mutant didn't express well. |
| <b>E1539</b> | 14.5 | -    |        | -     |        | 48.3  | <.0004 | 84.5 | <.0004 |                                 |
| <b>E1595</b> | 23.8 | -    |        | -     |        | 58.9  | <.0008 | 89.1 | <.0008 | 3 ind. $\Delta$ PIP clones      |
|              |      |      |        |       |        |       |        | 89.5 | <.0008 |                                 |
|              |      |      |        |       |        |       |        | 91.6 | <.0008 |                                 |
| <b>E1621</b> | 11.5 |      |        |       |        | 29.4  | 0.0078 | 81.1 | <.0006 | 2 ind. $\Delta$ C clones        |
|              |      |      |        |       |        | 31.5  | 0.0018 | -    |        |                                 |
| <b>E1635</b> | 9.0  | 89.0 | <.0008 | 66.0  | <.0008 | 45.0  | <.0008 | 97.0 | <.0008 |                                 |

**Table S2. Summary of cohesion assays.** Individual experiments (named at left) were scored to determine levels of sister chromatid cohesion in knock-down and rescue experiments as described for Figure 3. For statistical analysis, the level of cohesion rescue for a given ESCO2 mutant was compared to the rescue achieved by expression of the wild-type protein under the same conditions. P value was determined by Fisher exact test with Bonferroni's correction for multiple comparisons.

**Table S3.** Accession numbers of sequences analyzed in Figure 5A.

| <b>Accession</b>    | <b>organism</b>          | <b>common name</b>  | <b>Length<br/>(a.a.)</b> |
|---------------------|--------------------------|---------------------|--------------------------|
| <b>KZV11629.1</b>   | Saccharomyces cerevisiae | baker's yeast       | 281                      |
| <b>XP_011542723</b> | Homo sapiens             | man                 | 601                      |
| <b>NP_082315</b>    | Mus musculus             | mouse               | 592                      |
| <b>NP_001089603</b> | Xenopus laevis           | African clawed frog | 702                      |
| <b>NP_001003872</b> | Danio rerio              | zebrafish           | 609                      |
| <b>XP_420012</b>    | Gallus gallus            | chicken             | 691                      |
| <b>XP_007664914</b> | Ornithorhynchus anatinus | platypus            | 639                      |
| <b>XP_007475966</b> | Monodelphis domestica    | opossum             | 610                      |

**Table S4.** Plasmids used in this work

| Plasmid Name                             | #      | Source               | Cat # | Reference/Comments                                                              |
|------------------------------------------|--------|----------------------|-------|---------------------------------------------------------------------------------|
| pCS2/GFP-PCNA                            | pSR312 | Gift from Sansam lab |       | The PCNA-GFP fusion from (1) was cloned into pCS2+                              |
| mRuby-PCNA-19-NLS-4                      |        | Addgene              | 55876 | mRuby-PCNA-19-NLS-4 was a gift from Michael Davidson                            |
| mEmerald-MCM4-C-19                       |        | Addgene              | 54167 | mEmerald-MCM4-C-19 was a gift from Michael Davidson (2)                         |
| pET28/6His-Pre-GFP-PCNA                  | pZR07  | This work            |       | Bacterial expression of 6His-GFP-PCNA.                                          |
| pCS2/mCherry-LacI-NLS                    | pAP18  | This work            |       | mCherry-lacI was taken from plasmid containing Brg1 (3) and inserted into pCS2+ |
| pCS2/mCherry-LacI-NLS-ESCO2              | pAP20  | This work            |       | Derivative of pAP18; mCherry-lacI fused to full length ESCO2                    |
| pCS2/mCherry-LacI-NLS-ESCO2 $\Delta$ A   | pAP37  | This work            |       | Derivative of pAP20; ESCO2 $\Delta$ P97-E105                                    |
| pCS2/mCherry-NLS-LacI-ESCO2 $\Delta$ B   | pAP38  | This work            |       | Derivative of pAP20; ESCO2 $\Delta$ G209-F213                                   |
| pCS2/mCherry-NLS-LacI-ESCO2 $\Delta$ C   | pAp39  | This work            |       | Derivative of pAP20; ESCO2 $\Delta$ V326-S331                                   |
| pCS2/mCherry-NLS-LacI-ESCO2 $\Delta$ PIP | pEL17  | This work            |       | Derivative of pAP20; ESCO2 Q375A, I378A,                                        |
| pCDNA5/FRT-TO- sirESCO2                  | pAP11  | This work            |       | siRNA-resistant ESCO2: bp510-AGTGATCTATAAG to tGTcATtTAcAAaCCt                  |
| pCDNA5/FRT-TO-sirESCO2 $\Delta$ A        | pAP12  | This work            |       | Derivative of pAP11; ESCO2 $\Delta$ P97-E105                                    |
| pCDNA5/FRT-TO-sirESCO2 $\Delta$ B        | pAP13  | This work            |       | Derivative pAP11; ESCO2 $\Delta$ G209-F213                                      |
| pCDNA5/FRT-TO-sirESCO2 $\Delta$ C        | pAP14  | This work            |       | A derivative pAP11; ESCO2 $\Delta$ V326-S331                                    |
| pCDNA5/FRT-TO-sirESCO2 $\Delta$ PIP      | pEL18  | This work            |       | A derivative pAP11; ESCO2 Q375A, I378A,                                         |
| pCS2/ESCO2N-eGFP                         | pJC179 | This work            |       | N terminal 375 amino acids of ESCO2 fused to eGFP                               |
| pCS2/ESCO2N $\Delta$ A-eGFP              | pJC180 | This work            |       | Derivative of pJC179; ESCO2 $\Delta$ P97-E105                                   |
| pCS2/ESCO2N $\Delta$ B-eGFP              | pJC181 | This work            |       | A derivative of pJC179; ESCO2 $\Delta$ G209-F213                                |
| pCS2/ESCO2N $\Delta$ C-eGFP              | pJC182 | This work            |       | A derivative of pJC179; ESCO2 $\Delta$ V326-S331                                |

|                     |        |            |          |                                                                   |
|---------------------|--------|------------|----------|-------------------------------------------------------------------|
| pGEX/4T-2           |        | Invitrogen | 28954550 | Bacterial expression of GST or GST-fusion proteins                |
| pGEX/Box A          | pJC183 | This work  |          | GST-Box A fusion:<br>G <sub>225</sub> SSFYNQNKWYLNPLERKLIKE.      |
| pGEX/Box A5A        | pJC184 | This work  |          | GST Box A-5A fusion:<br>G <sub>225</sub> SSAANQNKWYLNPLAAALIKE.   |
| pGEX/Box B          | pJC185 | This work  |          | GST-Box B fusion:<br>G <sub>225</sub> SQKIKPQVTLQGGAAFFVRKKS.     |
| pGEX/Box B2A        | pJC186 | This work  |          | GST-Box B-2A fusion:<br>G <sub>225</sub> SQKIKPQVTLQGGAAA AVRKKS. |
| pGEX/Box C          | pJC187 | This work  |          | GST Box C fusion:<br>G <sub>225</sub> SPKSTVYPIFSASS.             |
| pGEX/Box C2A        | pJC188 | This work  |          | GST Box C-2A fusion:<br>GSPKSTVYPAASASS.                          |
| pGEX/PIP            | pJC189 | This work  |          | GST-ESCO2 PIP:<br>G <sub>225</sub> SIPKDQLIIDAGQKHFGA.            |
| pGEX/PIP2A          | pJC190 | This work  |          | GST-ESCO2 PIP-2A fusion:<br>G <sub>225</sub> SIPKDALIADAGQKHFGA.  |
| pGEX/P21-PIP        | pJC192 | This work  |          | GST-p21 PIP fusion:<br>G <sub>225</sub> SIPRRQTSMTDFYHSKRR.       |
| pGEX/P21-PIP2A      | pJC193 | This work  |          | GST-p21 PIP-2A fusion:<br>G <sub>225</sub> SIPRRATSATDFYHSKRR.    |
| pCS2+               |        |            |          | (4)                                                               |
| pCDNA5/FRT-TO       |        | Invitrogen | V652020  |                                                                   |
| mRuby-Fibrillarin-7 |        | Addgene    | 55862    | mRuby-Fibrillarin-7 was a gift from Michael Davidson              |



**Table S5. Antibodies used in this work**

| Antigen            | Source                            | No        | Lot      | Concentration |
|--------------------|-----------------------------------|-----------|----------|---------------|
| PCNA (FL-261)      | Santa Cruz                        | Sc-7907   | F1711    | IF 1:500      |
| MCM4               | Bethyl Labs                       | A300-193A |          | IF 1:500      |
| SMC3 <sup>Ac</sup> | Gift from Katsuhiko Shirahige (5) |           |          | IB 1:1500     |
| SMC3               | (6)                               |           |          |               |
| NCK                | NeoMarkers                        | RB0024    |          | IB 1:1000     |
| ESCO2              | Bethyl Labs                       | A301-689A | multiple | IB 1:1000     |
| HA-Tag             | Cell Signaling                    | C29F4     | 8        | IF 1:500      |
| Flag               | Sigma                             | F1804     | 101M6216 | 1:1000        |
| GST                | Lab made                          |           |          |               |
| ScPCNA             | Gift from Paul Kaufman            | #82 (7)   |          | 1:1,000       |

- Leonhardt H, Rahn HP, Weinzierl P, Sporbert A, Cremer T, Zink D, et al. Dynamics of DNA replication factories in living cells. *J Cell Biol.* 2000 Apr 17;149(2):271–80. PMID: PMC2175147
- Kuipers MA, Stasevich TJ, Sasaki T, Wilson KA, Hazelwood KL, McNally JG, et al. Highly stable loading of Mcm proteins onto chromatin in living cells requires replication to unload. *J Cell Biol.* 2011 Jan 10;192(1):29–41. PMID: PMC3019549
- Burgess RC, Burman B, Kruhlak MJ, Misteli T. Activation of DNA Damage Response Signaling by Condensed Chromatin. *CellReports.* The Authors; 2014 Dec 11;9(5):1703–17. PMID: PMC4267891
- Turner DL, Weintraub H. Expression of achaete-scute homolog 3 in *Xenopus* embryos converts ectodermal cells to a neural fate. *Genes Dev.* 1994 Jun 15;8(12):1434–47.
- Nishiyama T, Ladurner R, Schmitz J, Kreidl E, Schleiffer A, Bhaskara V, et al. Sororin mediates sister chromatid cohesion by antagonizing Wapl. *Cell.* 2010 Nov 24;143(5):737–49.
- Lafont AL, Song J, Rankin S. Sororin cooperates with the acetyltransferase Eco2 to ensure DNA replication-dependent sister chromatid cohesion. *Proc Natl Acad Sci USA.* 2010 Nov 23;107(47):20364–9. PMID: PMC2996691
- Franco AA, Lam WM, Burgers PM, Kaufman PD. Histone deposition protein Asf1 maintains DNA replisome integrity and interacts with replication factor C. *Genes Dev. Cold Spring Harbor Lab;* 2005 Jun 1;19(11):1365–75. PMID: PMC1142559
